# Supplementary material
Source: MDPI journal article supplement (https://www.mdpi.com/2311-7524/10/2/116)
Supplement: s1 [file s1]

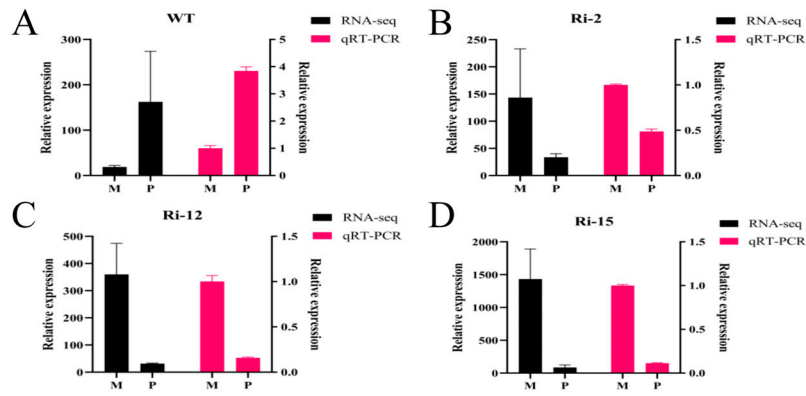

**Figure S1.** *PoMCA1* expression between wild type and *PoZCP26* RNAi strains from mycelia (M) to primordium (P) stage. Black: RNA-seq; Red: qRT-PCR.

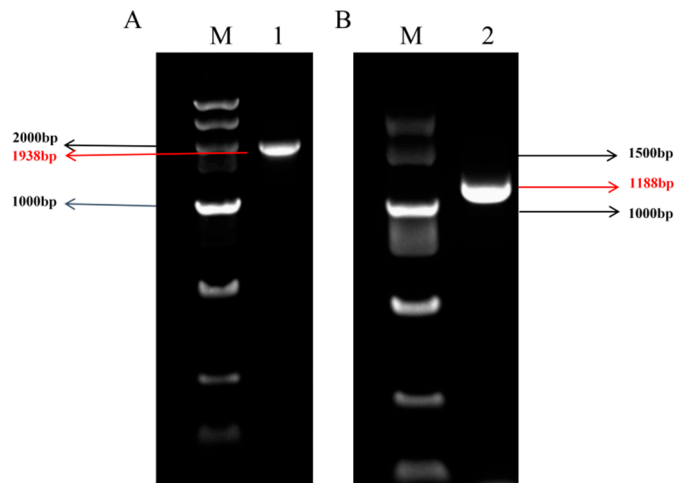

**Figure S2.** PCR amplification of *PoMCA1* DNA and CDS. A: DNA, B: CDS. M: Vazyme Marker DL5000bp; 1: DNA 1938 bp; 2: CDS 1188bp.

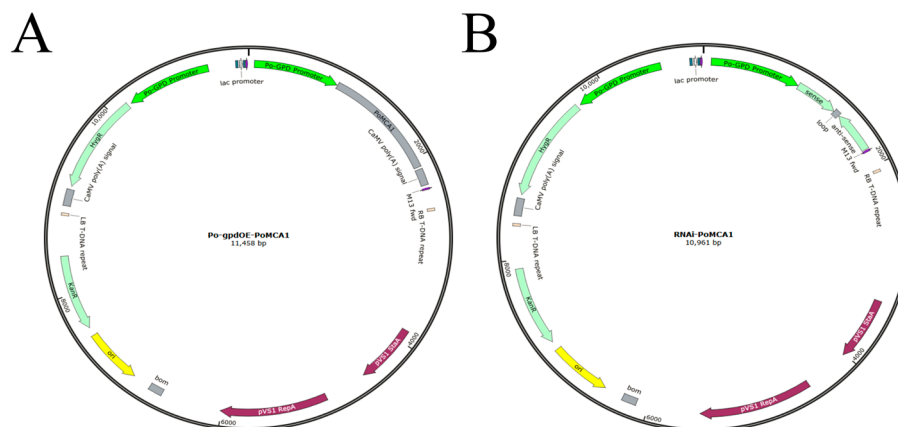

**Figure S3.** The plasmid maps. A: Po-gpdOE-PoMCA1. B: RNAi-PoMCA1.

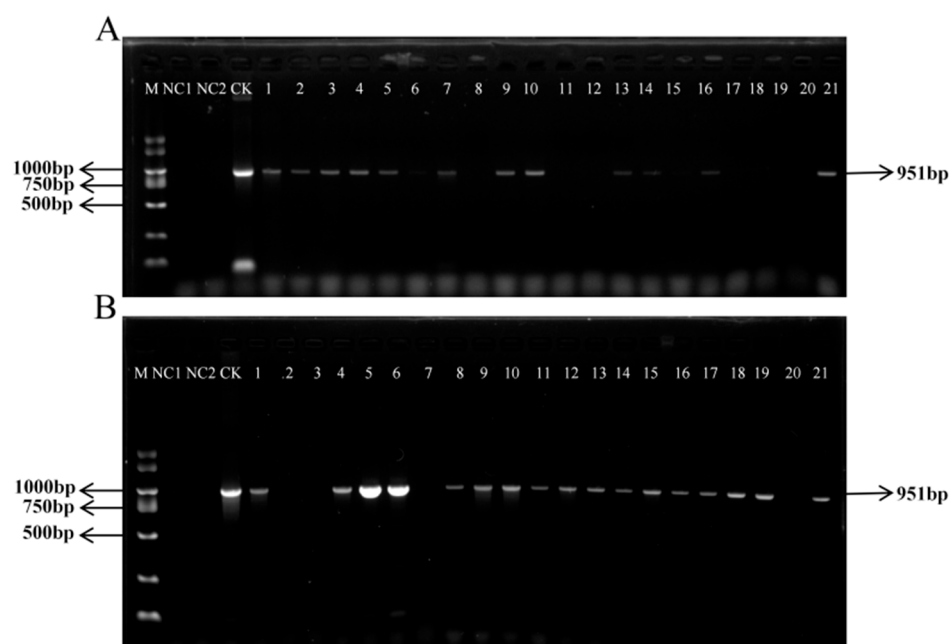

**Figure S4.** PCR amplification of the hygromycin B phosphotransferase fragment from genome DNA of putative transformants. A: Overexpression, B: RNAi; M: Vazyme Maker DL2000; Lane 1-21: Putative *PoMCA1* transformants; CK: Positive control (*PoMCA1* overexpression/RNAi plasmid); NC1: Negative control (wild-type); NC2: Negative control (ddH<sub>2</sub>O).

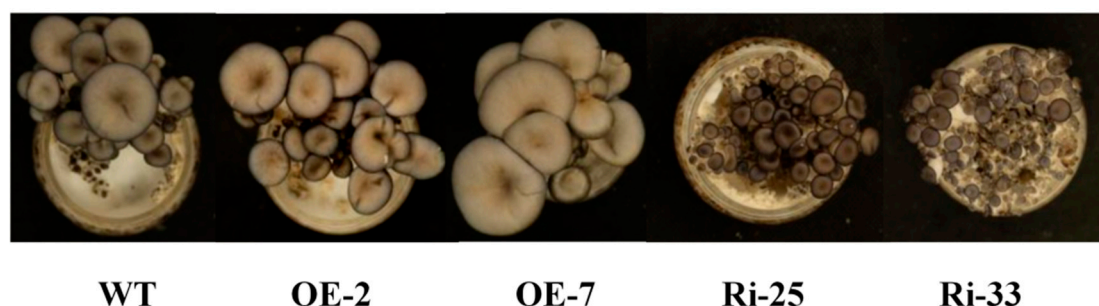

**Figure S5.** The phenotype of the fruiting bodies of wild type strains and transformants at the 28th day (from the time of inoculation).

**Table S1.** List of primers in this study.

| Primer name             | Sequence (5'-3')                         |
|-------------------------|------------------------------------------|
| PoMCA1-F                | ATGTGCTCTTCTGTCCCCAA                     |
| PoMCA1-R                | TCACAGACTAAGCTTGTGGT                     |
| OE-PoMCA1 F             | ACTGACCTGGGGATCCATGTGCTCTTCTGTCCCCAACG   |
| OE-PoMCA1 R             | GCATGCCAATTCTAGATCACAGACTAAGCTTGTGGTTGGG |
| Ri-sense-PoMCA1 F       | ACTGACCTGGGGATCCGAACGATGCTTTGAAAATGAAGA  |
| Ri-sense-PoMCA1 R       | GCATGCCAATTCTAGACTAGGGGCCGTTTGAGGTC      |
| Ri-anti-PoMCA1 F        | CGCCCCCTAGTCTAGACGAAAACGAGTTTGGTATTGGA   |
| Ri-anti-PoMCA1 R        | GGCCAGTGCCAAGCTTGAACGATGCTTTGAAAATGAAGA  |
| Hyg-F                   | CGACAGATCCGGTCGGCATCTACTCTATTTCTT        |
| Hyg-R                   | TCTCGTGCTTTCAGCTTCGATGTAGGAGGG           |
| qPoMCA1-F (For qRT-PCR) | CCAATCCCAATCCTTCCCTC                     |
| qPoMCA1-R (For qRT-PCR) | CATTCAAACCGAGCCCATTC                     |

---

|                               |                                   |
|-------------------------------|-----------------------------------|
| tub-F (Reference for qRT-PCR) | AGGCTTTCTTGCA <u>TTGGT</u> ACACGC |
| tub-R (Reference for qRT-PCR) | TATTCGCCTTCTTCCTC <u>ATC</u> GGCA |

---

The underlined letters denoted restriction enzyme cutting sites.
